# INFOGRAPHICS IN ANESTHESIOLOGY

Complex Information for Anesthesiologists Presented Quickly and Clearly

## From Two Lungs to One:

## Optimizing Ventilation

Transitioning to one lung ventilation (OLV) leads to increased shunting...

### Risk factors for hypoxemia

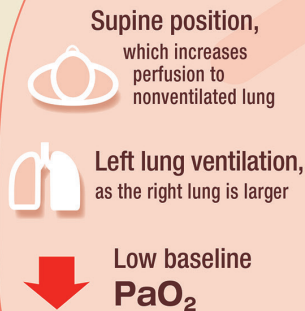

### Hypoxemia interventions

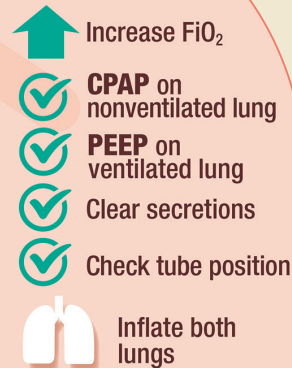

...which impairs oxygenation and can cause hypoxemia.<sup>1</sup>

## What is the best PEEP?

Park *et al.*<sup>2</sup> randomized 292 OLV patients to fixed vs. individualized PEEP:

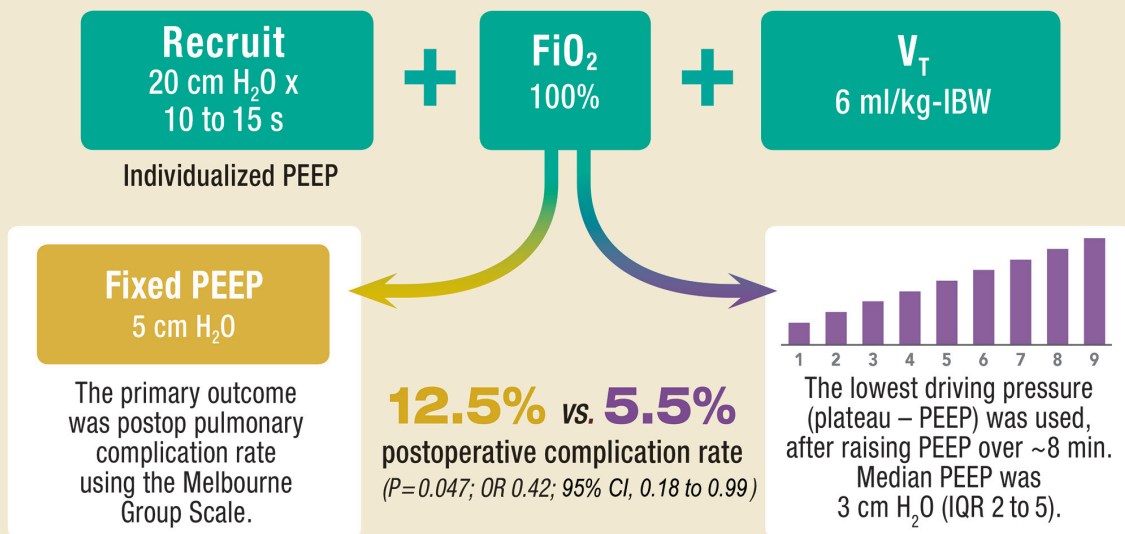

Utilization of patient-specific PEEP may be recommended for thoracic surgery.

CPAP, continuous positive airway pressure;  $\text{FiO}_2$ , fractional inspired oxygen tension; IBW, ideal body weight; IQR, interquartile range; OR, odds ratio; PEEP, positive end-expiratory pressure;  $V_T$ , tidal volume.

Infographic created by Jonathan P. Wanderer, Vanderbilt University Medical Center, and James P. Rathmell, Brigham and Women's Health Care/Harvard Medical School. Illustration by Annemarie Johnson, Vivo Visuals. Address correspondence to Dr. Wanderer: jonathan.p.wanderer@vanderbilt.edu.

1. Karzai W, Schwarzkopf K: Hypoxemia during one-lung ventilation: Prediction, prevention, and treatment. *ANESTHESIOLOGY* 2009; 110:1402–11

2. Park M, Ahn HJ, Kim JA, Yang M, Heo BY, Choi JW, Kim YR, Lee SH, Jeong H, Choi SJ, Song IS: Driving pressure during thoracic surgery: A randomized clinical trial. *ANESTHESIOLOGY* 2019; 130:385–93
